# Supplementary material for: Semi-field evaluation of the cumulative effects of a “Lethal House Lure” on malaria mosquito mortality
Source: Malar J. 2019 Aug 30;18:298. doi: 10.1186/s12936-019-2936-2 (PMC6716835; doi:10.1186/s12936-019-2936-2)
Supplement: Supplementary file 4 — Additional file 4. Cumulative mortality over two nights. This data files gives the cumulative proportion of dead mosquitoes over two nights regarding the hut treatment and mosquito age. [file 12936_2019_2936_MOESM4_ESM.csv]

Treatment	date released	date recaptured	test	night	age	released	recaptured	alive at recapture	dead at recapture	cumulative proportion dead	recapture rate	proportion dead with scavenging
Open windows and tubes	12-04-2017	12-05-2017	b	1	5	120	0	0	0	0	0.18	0
Open windows and tubes	12-04-2017	12-06-2017	b	2	5	120	22	22	0	0		0
Open windows and tubes	12/13/17	12/14/17	d	1	4	74	0	0	0	0	0.51	0
Open windows and tubes	12/13/17	12/15/17	d	2	4	74	38	38	0	0		0
Open windows and tubes	03-07-2018	03-08-2018	f	1	4	77	28	25	3	0.04	0.86	0.08
Open windows and tubes	03-07-2018	03-09-2018	f	2	4	77	38	37	1	0.05		0.1
Open windows and tubes	3/14/18	3/15/18	h	1	6	75	0	0	0	0	0.49	0
Open windows and tubes	3/14/18	3/16/18	h	2	6	75	37	37	0	0		0
Open windows and tubes	3/19/18	3/20/18	i	1	4	80	0	0	0	0	0.43	0
Open windows and tubes	3/19/18	3/21/18	i	2	4	80	34	32	2	0.03		0.06
Open windows and tubes	3/26/18	3/27/18	k	1	6	100	2	0	2	0.02	0.29	0.04
Open windows and tubes	3/26/18	3/28/18	k	2	6	100	27	20	7	0.09		0.18
Open windows and tubes	04-09-2018	04-10-2018	n	1	4	100	0	0	0	0	0	0
Open windows and tubes	04-09-2018	04-11-2018	n	2	4	100	0	15	0	0		0
Open windows and tubes	4/30/18	05-01-2018	q	1	4	100	0	0	0	0	0.25	0
Open windows and tubes	4/30/18	05-02-2018	q	2	4	100	25	22	3	0.03		0.06
Open windows and tubes	05-02-2018	05-03-2018	r	1	5	100	0	0	0	0	0.37	0
Open windows and tubes	05-02-2018	05-04-2018	r	2	5	100	37	31	6	0.06		0.12
Open windows and tubes	5/14/18	5/15/18	t	1	5	80	0	0	0	0	0.56	0
Open windows and tubes	5/14/18	5/16/18	t	2	5	80	45	44	1	0.01		0.02
Insecticide treated tubes and closed windows	11/30/17	12-01-2017	a	1	5	123	21	0	21	0.17	0.6	0.33
Insecticide treated tubes and closed windows	11/30/17	12-02-2017	a	2	5	123	53	42	11	0.26		0.51
Insecticide treated tubes and closed windows	12-06-2017	12-07-2017	c	1	4	90	10	2	8	0.09	0.83	0.18
Insecticide treated tubes and closed windows	12-06-2017	12-08-2017	c	2	4	90	65	47	18	0.29		0.57
Insecticide treated tubes and closed windows	03-05-2018	03-06-2018	e	1	4	140	5	0	5	0.04	0.49	0.08
Insecticide treated tubes and closed windows	03-05-2018	03-07-2018	e	2	4	140	63	34	29	0.24		0.47
Insecticide treated tubes and closed windows	03-12-2018	3/13/18	g	1	4	75	9	8	1	0.01	0.64	0.02
Insecticide treated tubes and closed windows	03-12-2018	3/14/18	g	2	4	75	39	31	8	0.12		0.24
Insecticide treated tubes and closed windows	3/21/18	3/22/18	j	1	4	90	14	0	14	0.16	0.66	0.31
Insecticide treated tubes and closed windows	3/21/18	3/23/18	j	2	4	90	45	28	17	0.34		0.67
Insecticide treated tubes and closed windows	3/28/18	3/29/18	l	1	4	100	17	4	13	0.13	0.54	0.25
Insecticide treated tubes and closed windows	3/28/18	3/30/18	l	2	4	100	37	20	17	0.3		0.59
Insecticide treated tubes and closed windows	04-04-2018	04-05-2018	m	1	5	100	4	0	4	0.04	0.7	0.08
Insecticide treated tubes and closed windows	04-04-2018	04-06-2018	m	2	5	100	66	46	20	0.24		0.47
Insecticide treated tubes and closed windows	4/23/18	4/24/18	o	1	5	100	11	0	11	0.11	0.48	0.22
Insecticide treated tubes and closed windows	4/23/18	4/25/18	o	2	5	100	37	18	19	0.3		0.59
Insecticide treated tubes and closed windows	4/25/18	4/26/18	p	1	5	100	9	1	8	0.08	0.73	0.16
Insecticide treated tubes and closed windows	4/25/18	4/26/18	p	2	5	100	64	57	7	0.15		0.29
Insecticide treated tubes and closed windows	05-07-2018	05-08-2018	s	1	3	110	0	0	0	0	0.57	0
Insecticide treated tubes and closed windows	05-07-2018	05-09-2018	s	2	3	110	63	48	15	0.14		0.27
Insecticide treated tubes and closed windows	5/16/18	5/17/18	u	1	4	100	8	0	8	0.08	0.71	0.16
Insecticide treated tubes and closed windows	5/16/18	5/18/18	u	2	4	100	63	48	15	0.23		0.45
