# Supplementary material for: Semi-field evaluation of the cumulative effects of a “Lethal House Lure” on malaria mosquito mortality
Source: Malar J. 2019 Aug 30;18:298. doi: 10.1186/s12936-019-2936-2 (PMC6716835; doi:10.1186/s12936-019-2936-2)
Supplement: Supplementary file 5 — Additional file 5. Cumulative mortality over four nights. This data files gives the cumulative proportion of dead mosquitoes over four nights regarding the hut treatment and mosquito age. [file 12936_2019_2936_MOESM5_ESM.csv]

Treatment	date released	date recaptured	test	night	age	released	recaptured	alive at recapture	dead at recapture	cumulative proportion dead	proportion dead with scavenging	recaptured over four nights	recapture rate
Open windows and tubes	06-11-2018	06-12-2018	b	1	5	200	13	12	1	0.01	0.17	135	0.68
Open windows and tubes	06-11-2018	6/13/18	b	2	5	200	73	72	1	0.01
Open windows and tubes	06-11-2018	6/14/18	b	3	5	200	38	29	9	0.06
Open windows and tubes	06-11-2018	6/15/18	b	4	5	200	11	5	6	0.09
Open windows and tubes	6/25/18	6/26/18	d	1	3	140	47	45	2	0.01	0.06	119	0.85
Open windows and tubes	6/25/18	6/27/18	d	2	3	140	64	62	2	0.03
Open windows and tubes	6/25/18	6/28/18	d	3	3	140	7	7	0	0.03
Open windows and tubes	6/25/18	6/29/18	d	4	3	140	1	1	0	0.03
Open windows and tubes	07-08-2018	07-09-2018	f	1	6	200	18	18	0	0	0.08	171	0.86
Open windows and tubes	07-08-2018	07-10-2018	f	2	6	200	85	83	2	0.01
Open windows and tubes	07-08-2018	07-11-2018	f	3	6	200	57	54	3	0.03
Open windows and tubes	07-08-2018	07-12-2018	f	4	6	200	11	8	3	0.04
Open windows and tubes	7/30/18	7/31/18	i	1	4	160	29	25	4	0.03	0.18	138	0.86
Open windows and tubes	7/30/18	08-01-2018	i	2	4	160	84	81	3	0.04
Open windows and tubes	7/30/18	08-02-2018	i	3	4	160	14	12	2	0.06
Open windows and tubes	7/30/18	08-03-2018	i	4	4	160	11	4	6	0.09
Open windows and tubes	8/13/18	8/14/18	k	1	5	160	67	65	2	0.01	0.07	129	0.81
Open windows and tubes	8/13/18	8/15/18	k	2	5	160	38	37	1	0.02
Open windows and tubes	8/13/18	8/16/18	k	3	5	160	16	15	1	0.03
Open windows and tubes	8/13/18	8/17/18	k	4	5	160	8	6	2	0.04
Open windows and tubes	09-03-2018	09-04-2018	m	1	3	170	65	64	1	0.01	0.05	147	0.86
Open windows and tubes	09-03-2018	09-05-2018	m	2	3	170	61	60	1	0.01
Open windows and tubes	09-03-2018	09-06-2018	m	3	3	170	14	14	0	0.01
Open windows and tubes	09-03-2018	09-07-2018	m	4	3	170	7	5	2	0.02
Insecticide treated tubes and closed windows	5/28/18	5/29/18	a	1	3	200	13	0	13	0.07	0.78	81	0.41
Insecticide treated tubes and closed windows	5/28/18	5/30/18	a	2	3	200	38	0	38	0.26
Insecticide treated tubes and closed windows	5/28/18	5/31/18	a	3	3	200	21	0	21	0.36
Insecticide treated tubes and closed windows	5/28/18	06-01-2018	a	4	3	200	9	1	8	0.4
Insecticide treated tubes and closed windows	6/18/18	6/19/18	c	1	5	140	10	0	10	0.07	0.67	51	0.36
Insecticide treated tubes and closed windows	6/18/18	6/20/18	c	2	5	140	21	0	21	0.22
Insecticide treated tubes and closed windows	6/18/18	6/21/18	c	3	5	140	6	0	6	0.26
Insecticide treated tubes and closed windows	6/18/18	6/22/18	c	4	5	140	14	3	11	0.34
Insecticide treated tubes and closed windows	07-02-2018	07-03-2018	e	1	4	200	19	2	17	0.09	0.91	99	0.5
Insecticide treated tubes and closed windows	07-02-2018	07-04-2018	e	2	4	200	38	0	38	0.28
Insecticide treated tubes and closed windows	07-02-2018	07-05-2018	e	3	4	200	20	0	20	0.38
Insecticide treated tubes and closed windows	07-02-2018	07-06-2018	e	4	4	200	22	4	18	0.47
Insecticide treated tubes and closed windows	7/17/18	7/18/18	g	1	3	200	4	0	4	0.02	0.95	115	0.58
Insecticide treated tubes and closed windows	7/17/18	7/19/18	g	2	3	200	47	0	47	0.26
Insecticide treated tubes and closed windows	7/17/18	7/20/18	g	3	3	200	40	2	38	0.45
Insecticide treated tubes and closed windows	7/17/18	7/21/18	g	4	3	200	24	8	16	0.53
Insecticide treated tubes and closed windows	08-06-2018	08-07-2018	j	1	4	170	50	0	50	0.29	0.96	83	0.49
Insecticide treated tubes and closed windows	08-06-2018	08-08-2018	j	2	4	170	22	0	22	0.42
Insecticide treated tubes and closed windows	08-06-2018	08-09-2018	j	3	4	170	9	0	9	0.48
Insecticide treated tubes and closed windows	08-06-2018	08-10-2018	j	4	4	170	2	0	2	0.49
Insecticide treated tubes and closed windows	8/27/18	8/28/18	l	1	3	200	26	0	26	0.13	0.93	134	0.67
Insecticide treated tubes and closed windows	8/27/18	8/29/18	l	2	3	200	33	0	33	0.3
Insecticide treated tubes and closed windows	8/27/18	8/30/18	l	3	3	200	23	0	23	0.41
Insecticide treated tubes and closed windows	8/27/18	8/31/18	l	4	3	200	52	15	37	0.6
